# Supplementary material for: USP28 controls SREBP2 and the mevalonate pathway to drive tumour growth in squamous cancer
Source: PubMed Central journal article supplement (PMC10307777; doi:10.1038/s41418-023-01173-6), 2023-05-18

**Figure 1a:**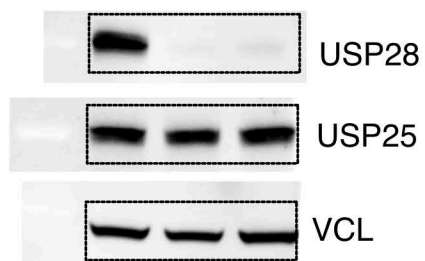**Figure 1f:**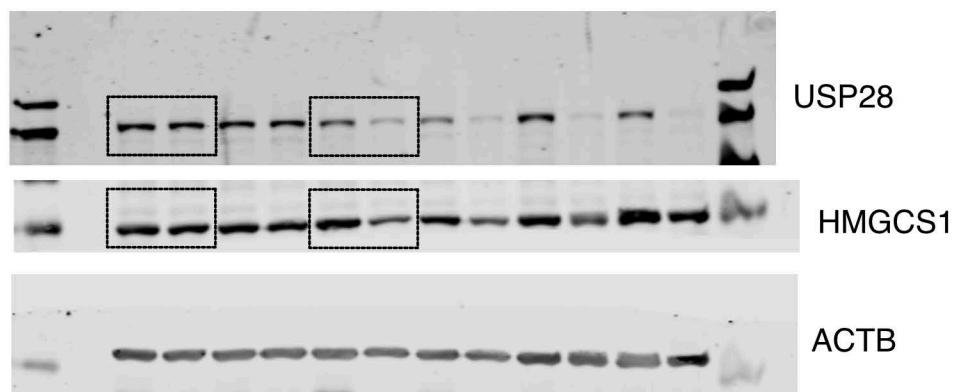**Figure S1c**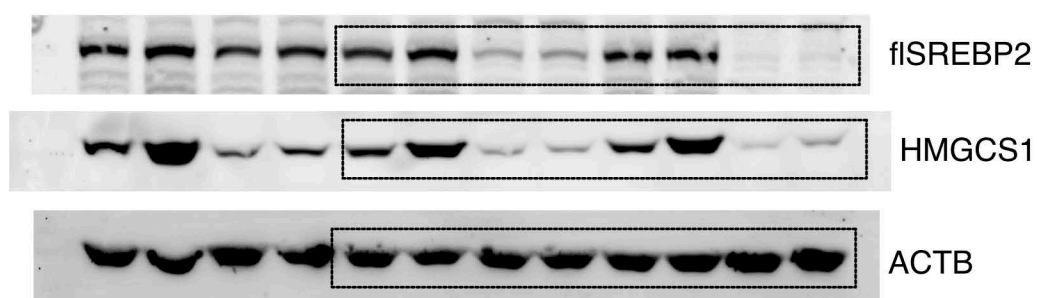**Figure S1h**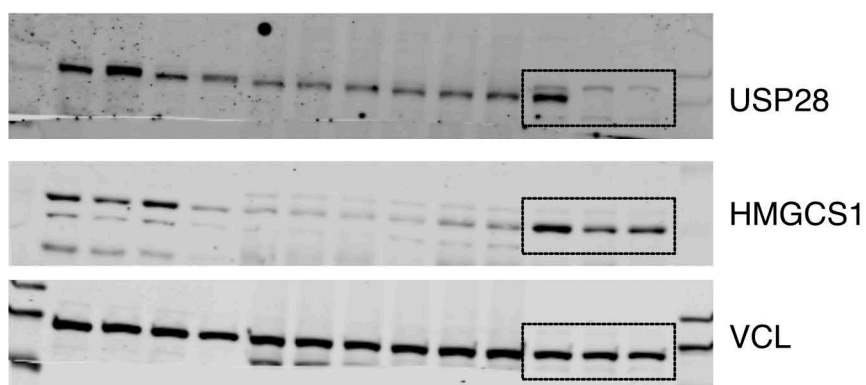

Figure 2a:

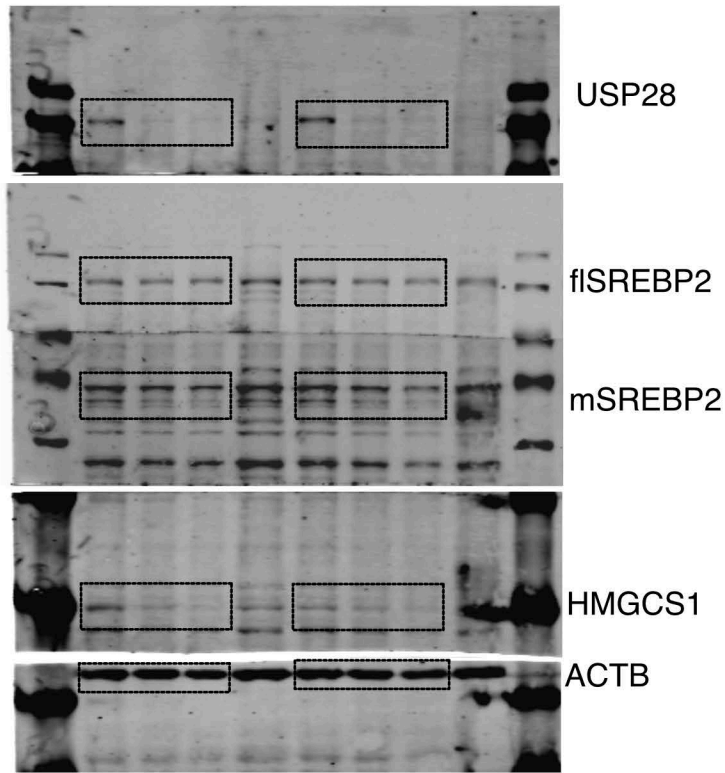

Figure 2c:

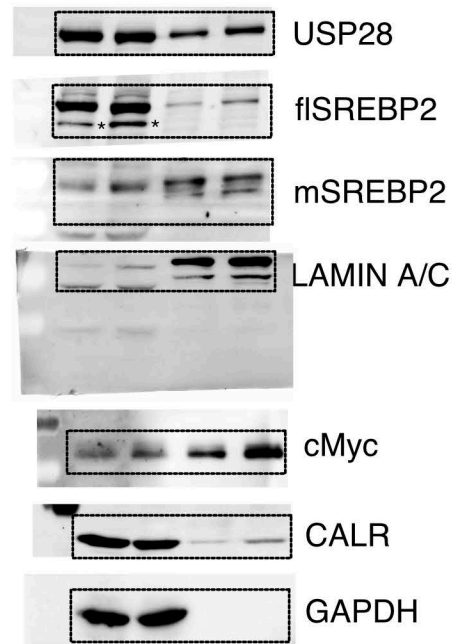

Figure 2e

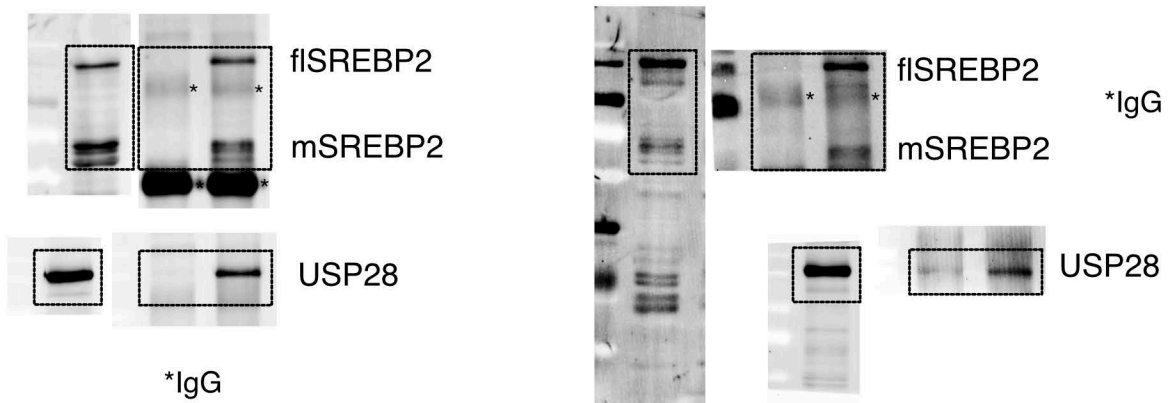

Figure 2f

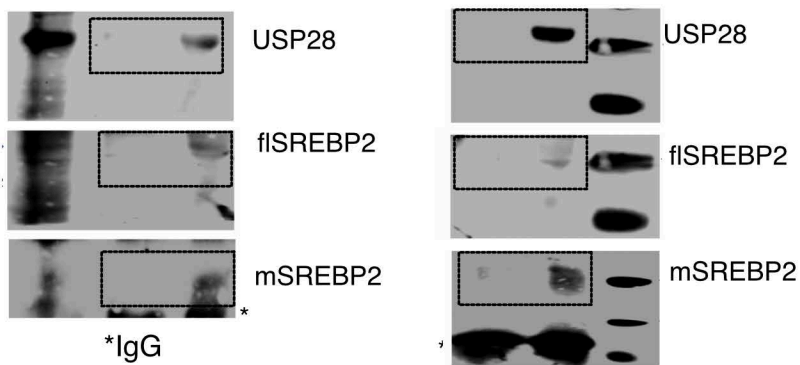

Figure 3a:

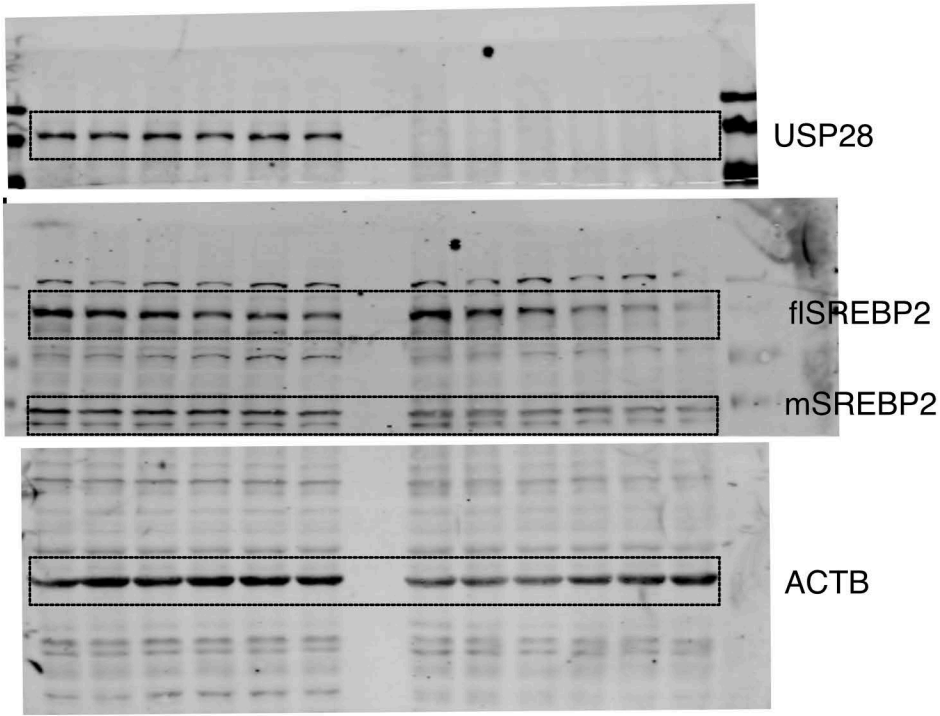

Figure 3f:

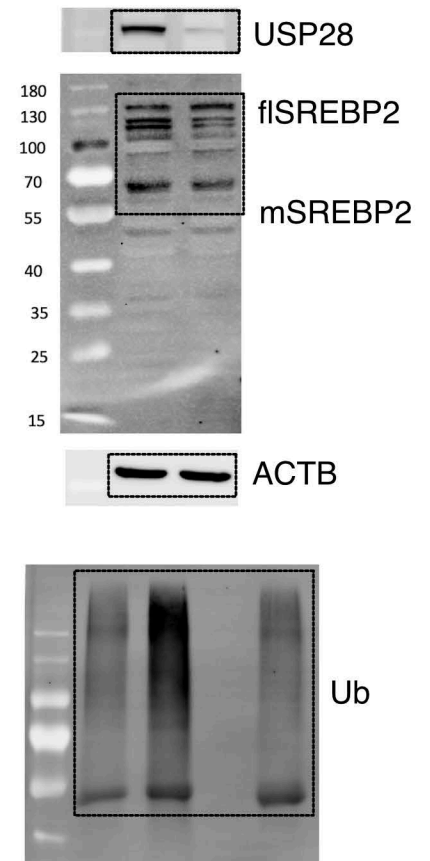

Figure 3c:

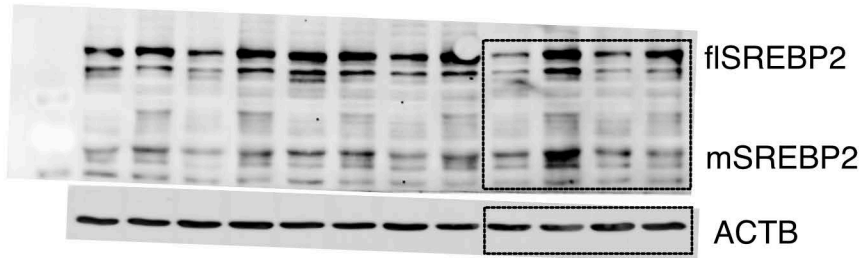

Figure 3d:

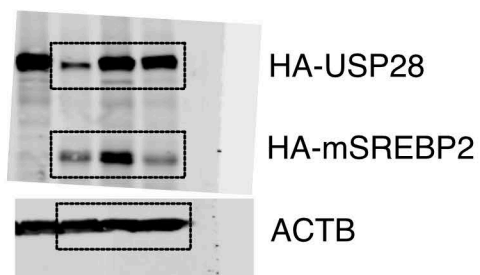

Figure 3g:

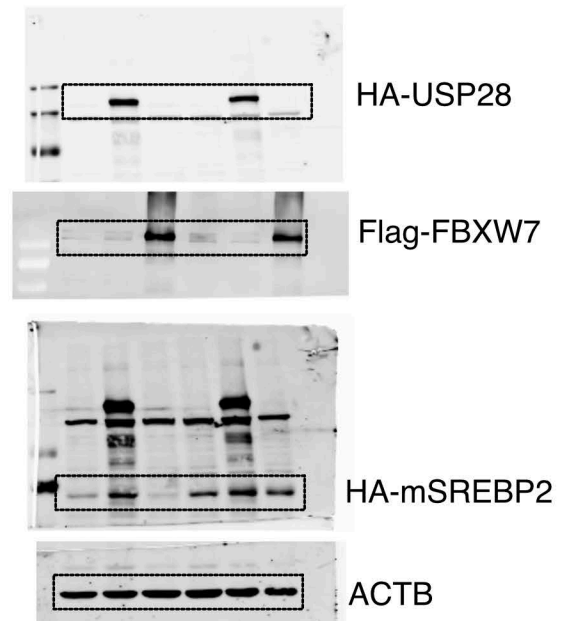

Figure 3e:

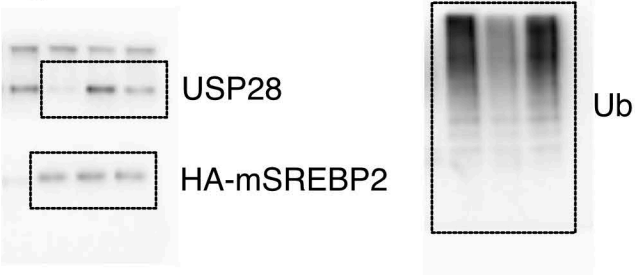

Figure S3a:

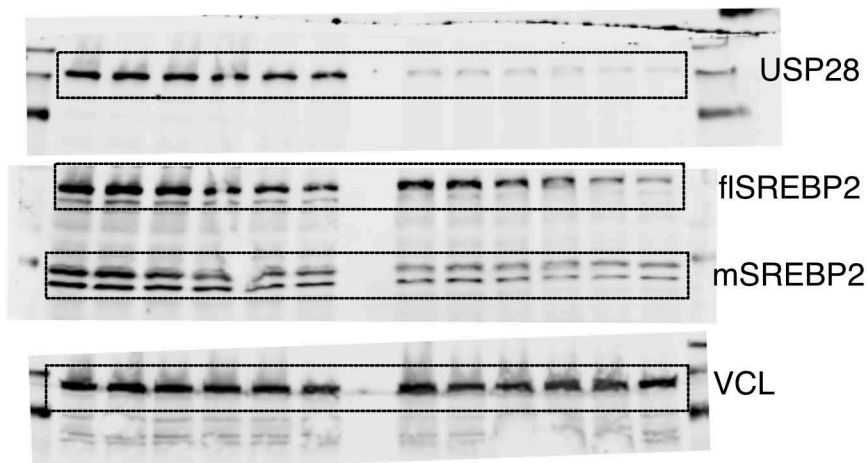

Figure S3c:

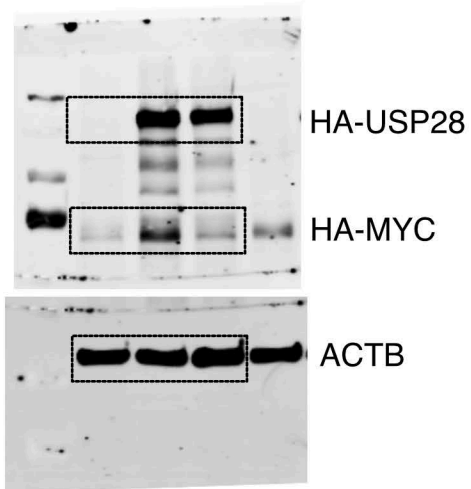

Figure S3d:

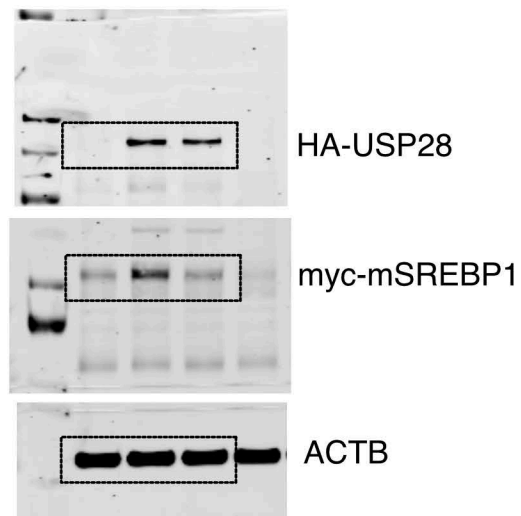

Figure S3e:

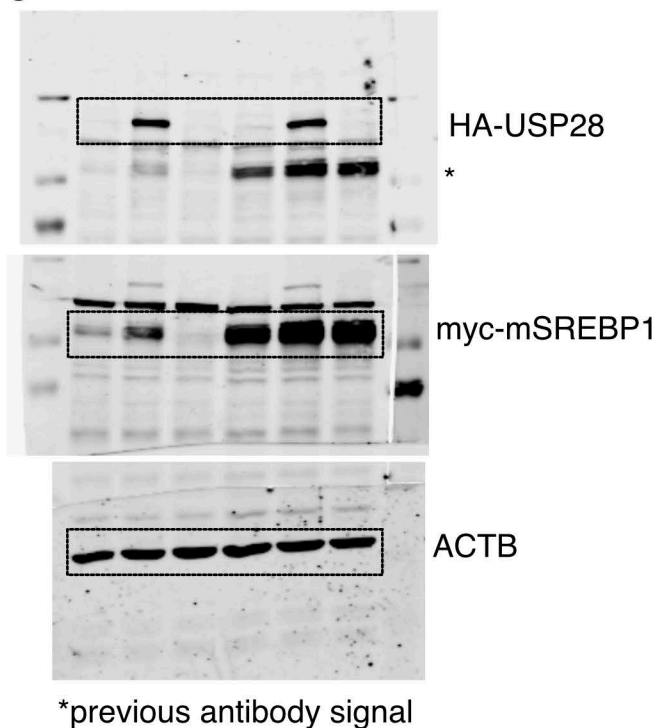

Figure S5e:

agarose gel

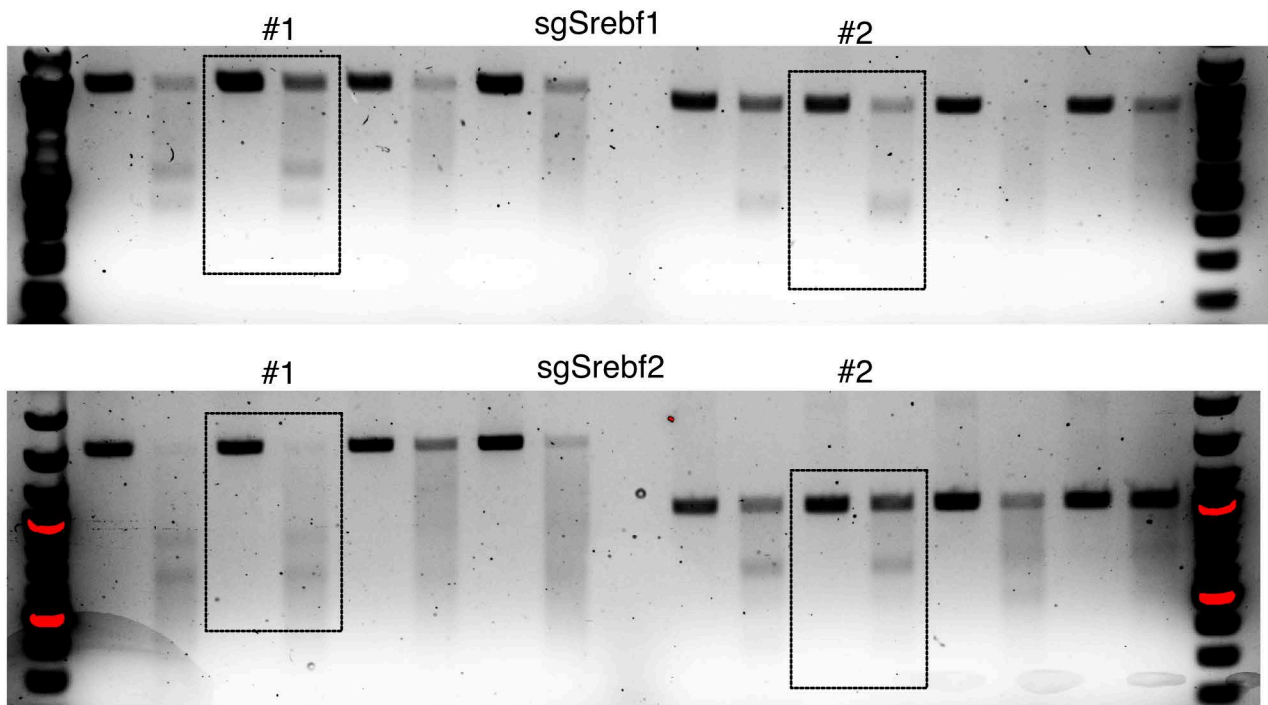

Figure S5f:

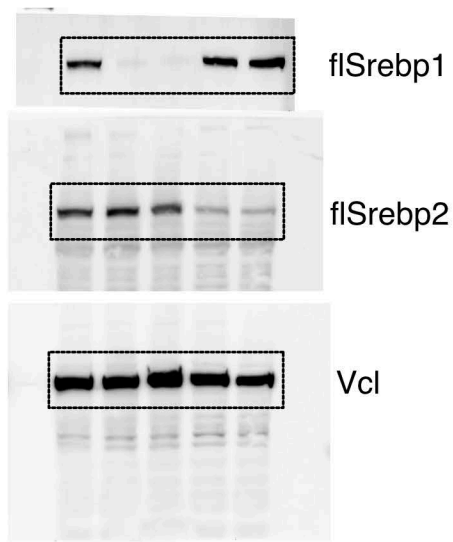

Figure S6h:

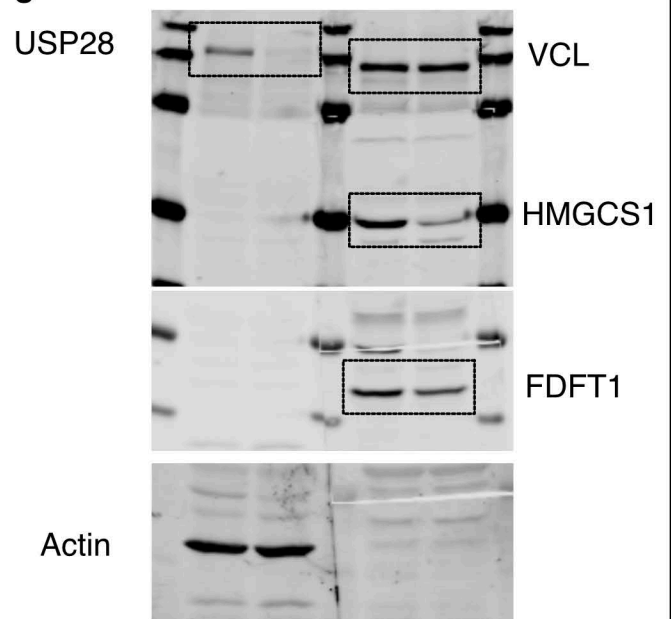

Supplement: 41418_2023_1173_MOESM2_ESM.pdf [file 41418_2023_1173_MOESM2_ESM.pdf]
